# Supplementary material for: Cancer-Associated Thrombosis on Bevacizumab: Risk of Recurrence and Bleeding When Bevacizumab Is Stopped or Continued
Source: MDPI journal article supplement (doi:10.3390/cancers15153893), 2023-07-31
Supplement: s1 [file s1]

## Supplementary Material

### Screening methodology of the patients in the three centers.

At the Georges Pompidou European Hospital: the term "bevacizumab" or "Avastin" was searched in the DX Care® computerized records as well as the PMSI VTE or PE coding (I26 or I80) between June 2000 and December 2020. Data were collected from the DX Care® software. Treatment periods were manually verified using data extracted from the CHIMIO® software.

At Louis Mourier Hospital: the list of patients who received bevacizumab / Avastin® was extracted from the prescription software between April 2009 and December 2020. The occurrence of VTE during the bevacizumab treatment period and data were collected from the Orbis® software. Treatment periods were manually verified using CHIMIO® software.

At the Georges François Leclerc Center: the terms "pulmonary embolism" or "venous thrombosis" were searched in the reports as well as the prescription of chemotherapy by bevacizumab / Avastin® on the Consore® software between June 2008 and December 2020. The occurrence of a VTE during the bevacizumab treatment period was manually checked for each record in Consore® and Clinicom®. Data and treatment periods were collected on Clinicom®.

| Cancer type                                      | N (%)   |
|--------------------------------------------------|---------|
| Cancer type                                      |         |
| Colorectal                                       | 78 (48) |
| Ovarian, endometrial                             | 28 (17) |
| Breast                                           | 15 (9)  |
| Lung                                             | 18 (11) |
| Central nervous system                           | 17 (11) |
| Liver cancer                                     | 1 (0.6) |
| Undifferentiated carcinoma pancreatic cancer     | 1 (0.6) |
| Neuroendocrine carcinoma of unknown primary site | 1 (0.6) |
| Biliary cancer                                   | 1 (0.6) |
| Kidney cancer                                    | 1 (0.6) |
| Pancreatic cancer                                | 1 (0.6) |

**Table S1. Cancer subtypes.** Variables are expressed as absolute value (percentage).

|                                                                                                                       | Population<br>n = 162 | No<br>recurrence<br>bleeding<br>n=114 | VTE<br>nor<br>bleeding<br>n = 48 | VTE recurrence<br>or bleeding n = 48 | p-value     |
|-----------------------------------------------------------------------------------------------------------------------|-----------------------|---------------------------------------|----------------------------------|--------------------------------------|-------------|
| Age at diagnosis                                                                                                      | 64 [55–71]            | 64 [55–71]                            | 63 [54–72]                       |                                      | 0.91        |
| Sex                                                                                                                   |                       |                                       |                                  |                                      |             |
| Female                                                                                                                | 96 (59%)              | 67 (59%)                              | 29 (60%)                         |                                      | 0.86        |
| Male                                                                                                                  | 66 (41%)              | 47 (41%)                              | 19 (40%)                         |                                      |             |
| BMI (n=156)                                                                                                           | 24.6 [21.0–28.0]      | 23.1 [20.4–27.0]                      | 26.0 [23.0–28.2]                 |                                      | <b>0.01</b> |
| ECOG Performance Status                                                                                               |                       |                                       |                                  |                                      |             |
| 0-1                                                                                                                   | 130/153 (85%)         | 89/107 (83%)                          | 41/46 (89%)                      |                                      | 0.45        |
| 2-3                                                                                                                   | 23 (15%)              | 18 (17%)                              | 5 (11%)                          |                                      |             |
|                                                                                                                       | 27/144 (19%)          | 21/102 (21%)                          | 6/42 (14%)                       |                                      | 0.48        |
| Renal failure<br>(eGFR < 60 mL/mn)                                                                                    |                       |                                       |                                  |                                      |             |
| Anemia (Hb<100 g/L)                                                                                                   | 11/153 (7%)           | 10/110 (9%)                           | 1/43 (2%)                        |                                      | 0.18        |
| Thrombocytosis (>300G/L)                                                                                              | 38/148 (26%)          | 27/106 (25%)                          | 11/42 (26%)                      |                                      | > 0.99      |
| Antiplatelet therapy                                                                                                  | 17/154 (11%)          | 11/91 (12%)                           | 6/63 (10%)                       |                                      | 0.79        |
| Cancer type                                                                                                           |                       |                                       |                                  |                                      |             |
| Colorectal                                                                                                            | 78 (48%)              | 56 (49%)                              | 22 (46%)                         |                                      | 0.73        |
| Ovarian, endometrial                                                                                                  | 28 (17%)              | 21 (18%)                              | 7 (15%)                          |                                      | 0.65        |
| Breast                                                                                                                | 15 (9%)               | 10 (9%)                               | 5 (10%)                          |                                      | 0.77        |
| Lung                                                                                                                  | 18 (11%)              | 10 (9%)                               | 8 (17%)                          |                                      | 0.17        |
| Central nervous system                                                                                                | 17 (10%)              | 13 (11%)                              | 4 (8%)                           |                                      | 0.78        |
| Others                                                                                                                | 6 (4%)                | 4 (4%)                                | 2 (4%)                           |                                      | > 0.99      |
| Histological subtype                                                                                                  |                       |                                       |                                  |                                      |             |
| Adenocarcinoma                                                                                                        | 119 (73%)             | 83 (73%)                              | 36 (75%)                         |                                      | 0.85        |
| Current treatment line                                                                                                |                       |                                       |                                  |                                      |             |
| 1 <sup>st</sup> line                                                                                                  | 74/152 (49%)          | 50/105 (48%)                          | 24/47 (51%)                      |                                      | 0.73        |
| 2 <sup>nd</sup> line                                                                                                  | 50 (33%)              | 34 (32%)                              | 16 (34%)                         |                                      | 0.85        |
| 3 <sup>rd</sup> line                                                                                                  | 28 (18%)              | 21 (20%)                              | 7 (15%)                          |                                      | 0.51        |
| Platinum salt treatment                                                                                               | 62 (38%)              | 45 (39%)                              | 17 (35%)                         |                                      | 0.72        |
| Metastatic disease                                                                                                    | 123/146 (84%)         | 88/102 (86%)                          | 35/44 (80%)                      |                                      | 0.33        |
| Metastases                                                                                                            |                       |                                       |                                  |                                      |             |
| Cerebral                                                                                                              | 9 (6%)                | 5 (4%)                                | 4 (8%)                           |                                      | 0.45        |
| Hepatic                                                                                                               | 57 (35%)              | 39 (34%)                              | 18 (38%)                         |                                      | 0.72        |
| VTE : venous thromboembolic events, BMI: body mass index, eGFR: estimated glomerular filtration rate, Hb: hemoglobin. |                       |                                       |                                  |                                      |             |

**Table S2. Baseline demographic and oncologic characteristics according to the occurrence of the primary endpoint.** Variables are expressed as median [interquartile range], or absolute value (percentage). Statistically significant values are in bold.

|                                                                                                                            | Population<br>n = 162 | No<br>recurrence<br>bleeding<br>n=114 | VTE<br>nor<br>bleeding<br>n = 48 | p-value |
|----------------------------------------------------------------------------------------------------------------------------|-----------------------|---------------------------------------|----------------------------------|---------|
| CAT localization                                                                                                           |                       |                                       |                                  |         |
| DVT                                                                                                                        | 58 (36%)              | 41 (36%)                              | 17 (35%)                         | 0.99    |
| PE                                                                                                                         | 81 (50%)              | 55 (48%)                              | 26 (54%)                         | 0.61    |
| DVT and PE                                                                                                                 | 23 (14%)              | 18 (16%)                              | 5 (20%)                          | 0.46    |
| PE localization                                                                                                            |                       |                                       |                                  |         |
| Segmental or more proximal                                                                                                 | 79/97 (81%)           | 52/67 (77%)                           | 27/30 (90%)                      | 0.17    |
| Subsegmental                                                                                                               | 18 (19%)              | 15/67                                 | 3/30 (10%)                       |         |
| Unilateral                                                                                                                 | 55/98 (56%)           | 39/68 (57%)                           | 16/30 (53%)                      | 0.38    |
| Bilateral                                                                                                                  | 43 (44%)              | 29 (43%)                              | 14 (47%)                         |         |
| Discovery mode                                                                                                             |                       |                                       |                                  |         |
| Clinically suspected                                                                                                       | 82/160 (51%)          | 60/113 (53%)                          | 22/47 (47%)                      | 0.49    |
| Incidental asymptomatic                                                                                                    | 14 (9%)               | 9 (8%)                                | 5 (11%)                          | 0.60    |
| Incidental symptomatic                                                                                                     | 72 (45%)              | 49 (43%)                              | 23 (49%)                         | 0.39    |
| Time between CAT and first<br>inclusion (days)                                                                             | 3080<br>[1947–4089]   | 2991<br>[1869–4045]                   | 239<br>[2587–4121]               | 0.15    |
| LMWH therapy                                                                                                               | 152 (94%)             | 92 (94%)                              | 59 (94%)                         | > 0.99  |
| Time between bevacizumab<br>initiation and CAT (days)                                                                      | 79 [39–154]           | 78 [39–153]                           | 82 [47–150]                      | 0.84    |
| Bevacizumab posology at CAT<br>diagnosis (mg/kg) (n=135)                                                                   | 7.5 [5–10]            | 7.5 [5–10]                            | 7.5 [5–10]                       | 0.88    |
| Platinum salt treatment                                                                                                    | 62 (38%)              | 45 (39%)                              | 17 (35%)                         | 0.72    |
| Other risk factor of CAT                                                                                                   | 37 (23%)              | 27 (24%)                              | 10 (21%)                         | 0.84    |
| Response to oncologic treatment                                                                                            |                       |                                       |                                  |         |
| Response                                                                                                                   | 40/154 (26%)          | 24/107(22%)                           | 16/47 (34%)                      | 0.16    |
| Stability                                                                                                                  | 76 (49%)              | 55 (51%)                              | 21 (45%)                         | 0.49    |
| Progression                                                                                                                | 38 (25%)              | 28 (26%)                              | 10 (21%)                         | 0.55    |
| CAT: cancer associated thrombosis, DVT: deep veinous thrombosis, PE: pulmonary embolism LMWH: low molecular weight heparin |                       |                                       |                                  |         |

**Table S3. Initial thromboembolism characteristics according to the occurrence of the primary endpoint.** Variables are expressed as median [interquartile range], or absolute value (percentage). Statistically significant values are in bold.

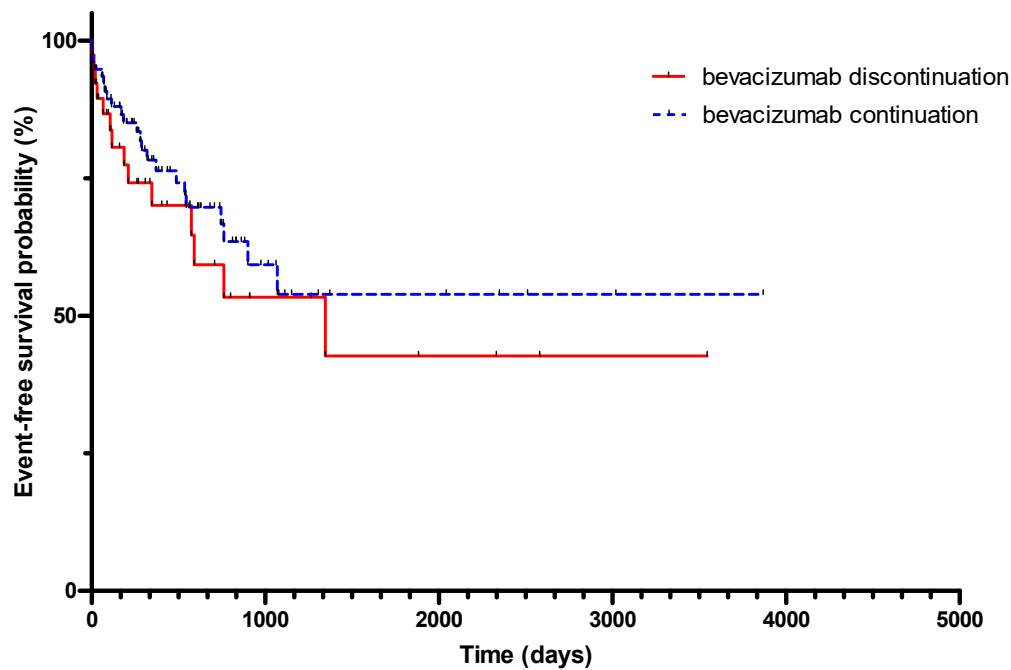

**Figure S1. Subgroup analysis in patient with a tumoral response or stability at the time of the CAT: occurrence of recurrent cancer associated thrombosis or bleeding according to the continuation or discontinuation of bevacizumab.** Hazard Ratio 0.76 for continuation, 95%CI (0.38–1.51),  $p=0.355$ .

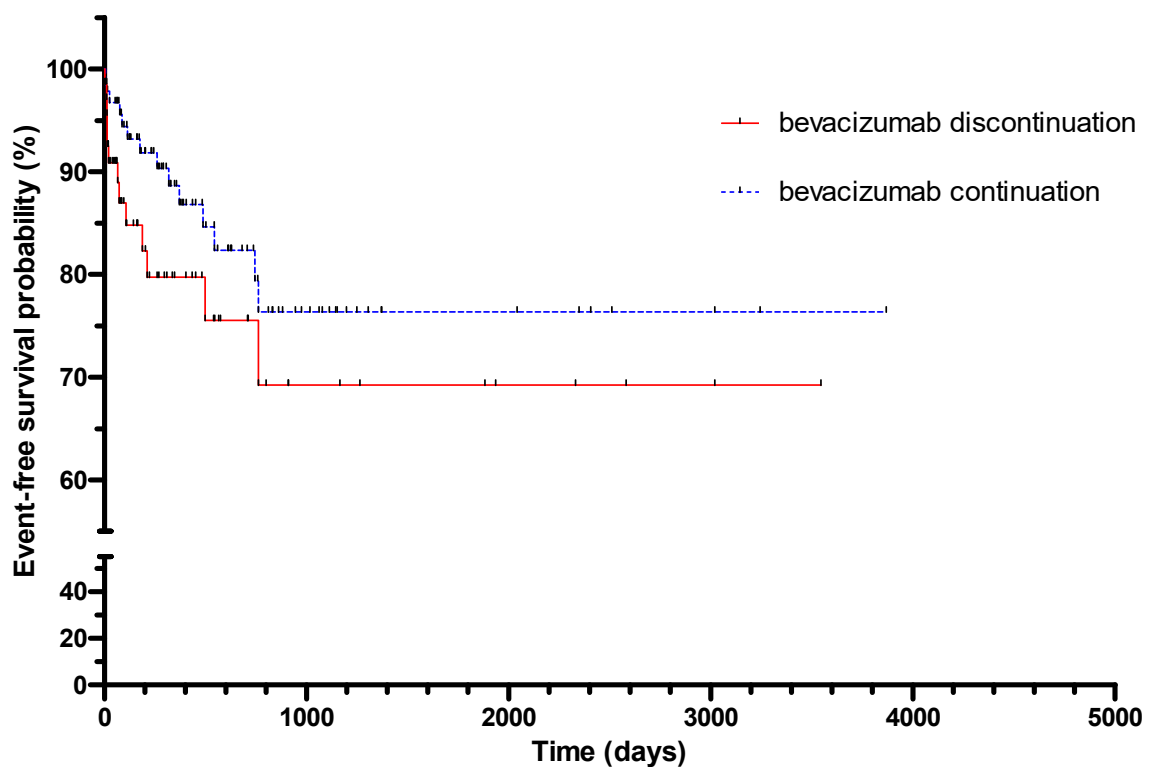

**Figure S2. Bleeding according to continuation or discontinuation of bevacizumab.** Hazard Ratio 0.64 for continuation, 95%CI (0.29-1.38)  $p = 0.225$ .

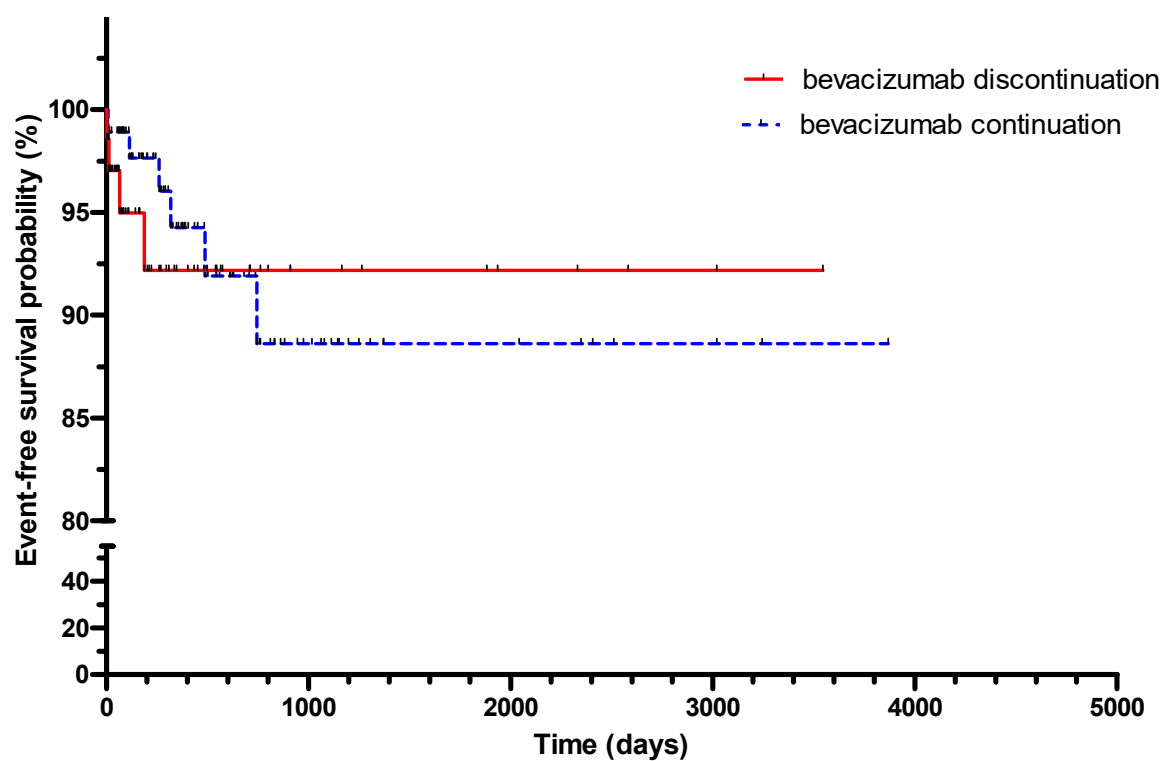

**Figure S3. Major bleeding according to continuation or discontinuation of bevacizumab.** Hazard Ratio 0.83 for continuation, 95%CI (0.23–3.02),  $p=0.766$ .

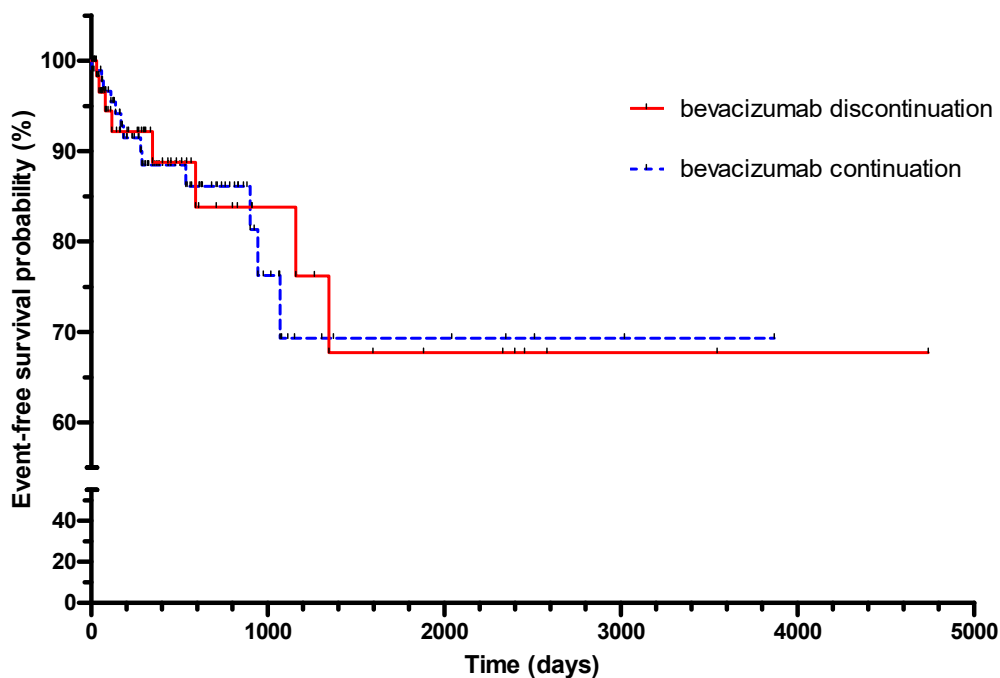

**Figure S4. Recurrence of CAT according to continuation or discontinuation of bevacizumab.** Hazard Ratio 0.93 for continuation, 95%CI (0.40-2.19)  $p=0.869$ .
